# Supplementary material for: Stereoselectivity, regioselectivity and mechanism in the intramolecular ‘citran’ bicyclisation of chromenes †
Source: Royal Society of Chemistry journal article supplement (doi:10.1039/b001310m), 2000-01-01
Supplement: b001310m.doc [file b001310m.doc]

# Supplementary data

Stereoselectivity, regioselectivity and mechanism in the intramolecular 'citran' bicyclisation of chromenes

**Cesar Calderon-Higginson, Leslie Crombie, Sally D. Redshaw and Donald A. Whiting***

*Department of Chemistry, The University of Nottingham, Nottingham, UK NG7 2RD*

## **Experimental**

## For experimental generalisations see ref. 1. The compounds derived from 1,3-dihydroxynaphthalene and described below are numbered according to the following system.-

# **Reaction between 2,4,6-trihydroxybenzaldehyde, (6E)-farnesal and pyridine**

2,4,6-Trihydroxybenzaldehyde (1.54g, 0 .01 mol), (6E)-farnesal (2.2g, 0.01 mol) and dry pyridine (0.8g, 0.01 mol) were stirred together at 500 for 60h. The residue was chromatographed on silica gel HF254 preparative plates (45 x 45cm). Elution with n-hexane-ether (3:1) gave three products.

The least polar, a pale yellow oil, was identified as the **bischromen 13** (290mg, 5%). (Found: M+ 558.373. C37H50O4 requires M+ 558.371); *v*max (CHCl3) 2925, 2850, 1645, 1620 and 1585cm-l; max (nm,EtOH) 221i (4.54), 224(4.58), 252i (4.13), 2.64i (4.32), 272 (4.41), 282i (4.37), 311i (3.97), 323i (3.81), 389 (3.25); H (CDC13) 12.37 (1H, s, OH),10.13 (1H, s),6.70 (1H, d, J 10Hz), 6.62 (1H, d, J 10Hz), 5.43 (2H, d, J 10Hz), 5.14 (4H, t, br.), 1.70 (6H, s), 1.62 (12H, s), 1.46 (6H, s); m/z 558 (10%) (M+), 407 (100%) (M-151), 271 (13%), 217 (21%).

The next product was isolated as a pale yellow oil (660mg, 18%). (Found: M+ 356.199. C22H280 4 requires (M+ 356.199). N.m.r. investigation of the oil indicated a mixture of the two **citrans 11a** and **11b** in the ratio 1:3 respectively. The major isomer **11b** had H (CDC13)

11.72 (s, OH), 10.02 (s, CHO), 6.00 (s, ArH), 5.20 (t, br, CH=C), 2.80 (m, br, 1'-H), 1.76 (s, Me), 1.70 (s, Me), 1.40 (s, Me) and 1.08 (s, Me). The minor isomer **11a** had H (CDC13) 12.10 (s, OH), 10.08(s, CHO), 5.98 (s, ArH), 5.20 (t, br, CH=C), 2.80 (m, br, 1'-H), 1.76 (s, Me), 1.70 (s, Me), 1.42 (s, Me) and 1.06 (s, Me). m/z (mixture) 356 (31%) (M+), 207 (67%), 206 (21%), 205 (100%) (M-151), 167 (25%), 109 (10%).

The most polar product, a pale yellow oil, was identified as the **chromen** **12** (1.42g, 38%). (Found: M+ 356.200. C22H2804 requires M+ 356.199); max (cm-1, CHCl3 ) 3550, 3170, 2900, 2820, 1640 and 1620; max (nm, EtOH) 219i (4.12), 260i (4.01), 271i (4.16), 281 (4.25), 287 (4.25), 298 (4.25), 349i and (3.39); H (CDC13) 12.05 (1H, s, OH), 10.06 (1H, s), 7.73 (1H, br., OH), 6.61 (1H**,** d, J 10Hz), 5.90 (1H, s), 5.54 (1H, d, J 10Hz), 5.12 (2H, t,**,** br.), 1.69 (3H, s), 1.61(6H, s), 1.45 (3H, s); m/z 356 (10%) (M+), 205 (100%) (M-151), 161 (16%), 121 (16%)g 119 (18%), 109 (18%)

**(6*Z*)-Farnesal**

(6*Z*)-Farnesol (prepared from *Z*-geranyl acetone via reaction with triethyl phosphonacetate and reduction of the resulting 6*Z*-ethyl farnesoate; 4g, 0.02 mol) was oxidised using pyridinium chlorochromate (6.0g, 0.03mol) to give (6Z)-farnesal (3.79g, 93%). G.1.c. analysis (Carbowax 20M, 1460) showed (2*Z*, 6*Z*)-farnesal (31%) and (2*E*, 6*Z*)-farnesal (69%); H (CDC13 ) 10.12 and 10.20 (each 1H, d, J 8Hz), 5.80 (1H, d, J 8Hz), 5.05 (2H, t, br.), 1.70 (6H, s), 1.60 (3H**,** s).

**Reaction between 2,4,6-trihydroxybenzaldehyde, (6*Z*)-farnesal and pyridine**

2,4,6-Trihydroxybenzaldehyde (2.2g, 0.014 mol), (6Z)-farnesal (3.08g, 0.014 mol) and dry pyridine (1.1g, 0.014 mol) were stirred together at 500 for 15h. The residue was chromatographed on silica gel HF254 preparative plates (45 x 45cm). Elution with n-hexane-ether (4:1) gave three products.

The least polar, a pale yellow oil, was identified as the **bischromen 18** (347mg, 4%). (Found: M+ 558.373. C37H5004 requires M+ 558.371); max (cm-1,CHCl3 ) 2910, 2850, 1645, 1620 and 1585; max (nm, EtOH) 222i (4.01), 2.52i (4.12), 264i (4.34), 272 (4.44), 282i (4.40), 2.94i (4.26), 310i. (3.87), 389 (3.32); H (CDC13) 12.38 (1H, s, OH), 10.06 (IH, s), 6.64 (1H, d, J lO Hz), 6.58 (1H, d, J 10Hz), 5.38 (2H, d, J 10Hz), 5.10 (4H, t, br.), 1.70

(12H, s), 1.60 (6H, s), 1.42 (6H, s); m/z 558 (25%) (M+), 407 (100%) (M-151), 271 (29%), 217 (41%).

The next product was obtained as a pale yellow oil (487mg, 10%): (Found: M+ 356.201. C22H2804, requires M+ 356.199). N.m.r. investigation of the oil indicated a mixture of the two **citrans 16a** and **16b** in the ratio 1:3 respectively. The major isomer **16b** had  (CDC13) 11.70 (s, OH), 10.01(s, CHO), 5.96 (s, ArH), 4.99 (t, br, CH=C), 2.76 (m, br, 1'-H), 1.66 (s, Me), 1.62 (s, Me), 1.55 (s, Me) and 1.40 (s, Me). The minor isomer **16a** had H (CDC13) 12.00 (s, OH), 10.01(s, CHO), 5.92 (s, ArH), 4.99 (t, br, CH=C), 2.76 (m, br, 1'-H), 1.66 (s, Me), 1.62 (s, Me), 1.50 (s, Me) and 1.41 (s, Me); m/z 356 (39%) (M+), 247 (12%), 207 (63%), 206 (20%), 205 (100%) (M-151), 167 (10%), 109 (8%).

The most polar product was the **chromen** **17**. as a yellow oil (2.14g, 43%): (Found: M+ 356.201. C22H28O4 requires M + 356.199); max (cm-1, CHCl3) 3540, 3160, 3040, 2950,

1640, and 1625; max (nm , EtOH) 218i. (5.98), 260i (3.74), 271i.(3.91), 293i (4.10), 298 (4.11) and 346i (3.24); H (CDC13) 11.94 (1H, s, OH), 10.03 (1H, s), 8.56 (1H, br., OH), 6.62 (1H, d, J 10Hz), 5.92 (1H, s), 5.42 (1H, d, J 10Hz), 5.12 (2-H, t, br.), 1.72 (6H, s),1.63 (3H, s), 1.48 (3H, s); m/z 356 (37%) (M+), 207 (10%), 206 (55%), 205 (100%) (M-151), 203 (20%), 167 (24%), 121 (8%), 109 (6%).

# **Treatment of chromene 12 with (+)-camphorsulfonic acid**

A solution of the **chromen 12** (1.25g) and (+)-camphor sulphonic acid (50mg) in dry benzene (50ml) was brought to reflux. After 9h., no chromen could be discerned by t.l.c. in the complex product mixture. The volume of the solution was reduced to ca.10cm3 and ether (20cm3) was added. The organic solution was washed with saturated sodium bicarbonate solution and with water, dried, and evaporated. Chromatography on silica gel HF254 preparative plates (45 x 45cm) eluting with chloroform-acetone (97:3) gave a 1:1 mixture (118mg) (Found: M+ 356.200) of the two citrans **11a** and **11b**, identified by comparison with the above specimen.

### Treatment of chromene 17 with (+)-camphorsulfonic acid

A solution of the chromen **17** (1.00g) and (+)-camphor sulphonic acid (50mg) in dry benzene (50cm3) was brought to reflux. After 4h., no chromen appeared to remain. The volume of the solution was reduced to ca.10cm3 and ether (20 cm3) was added. The organic solution was washed with saturated sodium bicarbonate solution and water, dried and evaporated. Chromatography on silica gel HF254 preparative plates (45x 45cm) eluting with n-hexane-ether (4:1) gave the citran **16a** (99mg, 10%), as the least polar product (Found: M+ 356.200). identified by 1Hnmr comparison with the above samples.

**7- and 7-Methyl farnesylidene malonic acid 19a and 19b**

Malonic acid (26g, 0.25mol) was added to (6*E*, *Z*)-farnesal (27.5g, 0.125 mol) and dry pyridine (10g, 0.125 mol), and the mixture was heated to 1100 for 5h. Dry ether was added to the cooled product, which was then set aside at 00 for 18h. The crude crystalline product (9.22g, 24%) was filtered off and chromatographed on silica gel HF254 preparative plates.

Elution with ethyl acetate gave the two isomeric farnesylidene malonic acids. 7.-Methyl farnesylidene malonic acid (4.86g, 12.7%) (less polar) crystallised from ethanol as white needles m.p. 141-20 (lit.5 141-20). The more polar product, 7-methyl farnesylidene malonic acid (2.42g, 6.3%) gave white needles from ethanol, m.p. 170-10 (lit.5 171-20).

# **Pyrolysis of 7-methyl farnesylidene malonic acid**

7-Methyl farnesylidene malonic acid (6g) was heated under water pump vacuum at 2000 in the presence of a little copper bronze for 3h. Ether was added to the cooled product, and the ethereal solution was extracted repeatedly with 2M-sodium hydroxide solution. The alkaline extracts were extracted with ether, and these ether extracts discarded. Acidification (Congo Red) of the alkaline extract (under ether, cold) gave the acidic products (3.22g, 63%).

The crude acidic products were methylated using diazomethane. A portion (1g) of the methylated material was chromatographed on silica gel HF254 preparative plates. Multiple elution with n-hexane-ether (19:1) showed four components. By extensive chromatography, homogeneous samples of the least polar and two most polar components were obtained: the second component proved impossible to resolve completely.

# The least polar product was the **methyl ester 20a** as a colourless oil (108mg, ll%); (Found: M+ 276.208. C18 H2802 requires M+ 276.209);  max (cm-1 ,CHCl3 ) 2940, 2860, 1715, 1630, 1590; max (EtOH) 278nm (3.95); H (CDC13) 7.20 (1H, d, J10Hz, 2-H), 6.84 (1H, d of d, J10,10Hz, 3-H), 5.56 (1H, d, J10Hz, 4-H), 5.10 (2H, t, br, 8-H, 12-H), 3.72 (3H, s, OMe), 1.96 (3H, s, Me), 1.08 (3H, s, Me), 1.60 (6H, s, 2xMe); C (CDC13) 167.2(s), 150.2 (s), 140.7 (d), 135.7 (s), 131.2 (s), 124.3(d), 123.5 (d), 121.6 (d), 114. 6 (d), 50.9 (q), 40.64(t), 39.7 (t), 26.8 (t), 26.5 (t), 25.6 (q), 17.7 (q), 16.7 (q), 16.0 (q); m/e 276 (8%) (M+), 140 (48%), 137 (18%), 125 (30%), 109 (21%), 95 (33%), 93 (50%), 81 (100%) (M-195).

The next component was the **methy1 ester 20c** as a colourless oil (285mg, 29%); (Found: M+ 276.208);  max (cm-1 ,CHCl3) 2960, 2870, 1710, 1655, 1635; max (nm, EtOH) 277; H (CDC13) 7.51 (IH, d of d, *J* 16,12Hz, 3-H), 5.96 (1H, d, *J* 12Hz, 2-H), 5.74 (1H, d, *J* 16Hz, 4-H), 5.10 (2H, t, br, 8-H, 12-H), 3.67 (3H, s, OMe),1.89 (3H, s, Me), 1.72 (3H, s, Me), 1.65 (6H, s, 2xMe);C (CDC13) 167.8 (s), 149.7 (s), 140.8 (d), 136.1 (s), 131.1 (s), 124.4 (d), 124.3 (d), 123.0 (d)g 118.4 (d), 51.1 (q), 39.7 (t), 32.9 (t), 26.8 (t), 26.7 (t), 25.6 (q), 24.3 (q), 17.60 (q), l6.0 (q); m/z 276 (6%) (M+), 140 (38%), 137 (13%), 125 (19%), 109 (10%), 95 (19%), 93 (17%), 81 (100%) (M-195).

The remaining product was obtained as a colourless oil (208mg, 21%), and was identified as the **methyl_ester 20d** (Found: M+ 276.208); max (cm-l,CHCl3 ) 2940, 2870,1710, 1660,1635;  max(nm, EtOH) 277 (4.20);H (CDC13) 7.53 (1H, d of d, *J* 16Hz, 12Hz, 3-H), 5.96 (1H, d, *J* 12Hz, 2-H), 5.76 (IH, d, *J* 16Hz, 4-H), 5.08 (2H, t, br, 8-H, 12-H), 3.81 (3H, s, OMe)*,* 1.90 (3H, s, Me), 1.71 (3H, s, Me), 1.65 (6H, s, 2xMe); (CDC13) 168.0 (s), 149.8 (s), 141.1 (d), 135.8 (s), 131.3 (s), 124.2 (d), 123.8 (2 x d), 118.5 (d), 51.3 (q), 40.3 (t), 39.7 (t), 26.7 (t), 26.3 (t), 25.7 (q), 17.7 (q), 17.4 (q), 16.0 (q); m/e 276 (6%, M+), 140 (73%), 137 (21%), 125 (25%), 109 (8%), 95 (15%), 93 (21%), 81 (100%)(M-195).

**Pyrolysis of 7-methyl farnesylidene malonic acid**

7-Methyl farnesylidene malonic acid (1.25g) was heated under water pump vacuum at 2000 in the presence of a little copper bronze for 3h. The products were isolated as in the preceding experiment.

The least polar product was the **methy1 ester** **20e**as a colourless oil (41mg, 9%); (Found: m/z 276.208);  (cm-1,CHCl3 ) 2950, 2870, 1715, 1630; max (nm, EtOH) 278 (3.86); (CDC13) 7.17 (1H, d, *J* 12Hz, 2-H), 6.94 (1H, dd, *J* 12,12Hz, 3-H), 5.57 (1H, d, *J* 12Hz, 4-H), 5.11 (2H, t, br, 8-H, 12-H), 3.63 (3H, s, OMe), 1.87 (3H, s, Me), 1.72 (6H, s, 2xMe), 1.63.(3H,s, Me); C (CDC13) 167.2 (s), 150.2(s), 140.7 (d), 135.8 (s), 131.5 (s), 124.3 (2d), 121.6 (d), 114.6 (d), 50.9 (q), 41.0 (t), 32.1 (t), 26.6 (t), 26.4 (t), 25.7 (q), 23.49 (q), 17.7 (q), 16.7 (q); m/e 276 (4%, M+), 140 (18%), 137 (16%), 125 (18%), 109 (13%), 95 (25%), 93 (25%), 81 (100%) (M-195).

The next product was the **methy1 ester 20g** obtained as a colourless oil (112mg, 24%); (Found: M+ 276.206); max (cm-1,CHCl3 ) 2970, 2880, 1715, 1655; max (nm , EtOH) 277 (4.26); (CDC13) 7.55 (1H, dd, *J* 14Hz, 12Hz, 3-H), 5.96 (1H, d, *J* 12Hz, 2-H), 5.73 (1H, d, J 14H, 4-H), 5.11 (2H, t, br, 8-H, 12-H), 3.76 (3H, s, OMe), 1.90 (3H,s, Me), 1.72 (6H, s, 2xMe), 1.61 (3H,s, Me); C (CDC13) 168.0 (s), 149.9 (s), 140.9 (d), 136.3 (s), 131.6 (s), 124.2 (2d), 124.0 (d), 118.4 (d), 51.3 (q), 33.2 (t), 32.1 (t), 26.7 (2t), 25.7 (q), 24.4 (q), 23.3 (q), 17.7 (q); m/e 276 (8%, M+), 140 (48%), 137 (25%), 125 (30%), 107 (44%), 95 (56%), 93 (39%), 81 (100%) (M-195).

The remaining and most polar component was the **methyl ester 20h** obtained as a colourless oil (84mg, 18%); (Found: M+ 276.208); max (cm-1,CHCl3 ) 2970, 2860, 1710,1655; max (nm , EtOH) 277(4.23); H (CDC13) 7.56 (1H, d of d, *J* 16,12Hz, 3-H), 5.99 (1H, d, J 12Hz, 2-H), 5.78 (1H, d, *J* 16Hz, 4-H), 5.11 (2H, t, br, 8-H, 12-H), 3.76 (3H, s, OMe), 1.88 (3H, s, Me), 1.73(6H, s, Me), 1.63 (3H, s, Me); C (CDC13) 168.0 (s), 149.8 (s), 141.2 (d), 136.0 (s), 131.6 (s), 124.3 (d), 124.0 (d), 123.3 (d), 118.5 (d), 51.3 (q), 40.6 (t), 32.1 (t), 26.6 (t), 26.2 (t), 25.7 (q), 23.4 (q), 17.7(q), 17.4 (q); m/e 276 (4%, M+), 140 (50%), 137 (31%), 125 (21%), 109 (8%), 95 (37%), 93 (21%), 81 (100%) (M-195).

# **Condensation of 1,3-dihydroxynaphthalene with citral**

1,3-Dihydroxynaphthalene (0.5g, 3.12mmol) was condensed with citral (0.42ml, 3.12mmol) in the presence of pyridine (0.24ml, 3.12mmol) at 4OOC for 16 hours with stirring. The cooled mixture was diluted with chloroform (20ml) and poured into an aqueous 10% hydrochloric acid solution. The organic layer was separated, dried with magnesium sulphate and the solvent was evaporated. On tlc, two products were UV active, and two more were detected with Fast Blue Salt B. Column chromatography afforded the following compounds.

The first eluted compound was identified as the **bischromen 26** as a yellowish oil (93mg, 7%); (Found m/z 428.270; C30H3602 requires M+ 428.272); max (cm-1, KBr) 3020, 1690, 1620, 1560, 1430, 118O;  max (nm,EtOH), 236 (4.38), 288 (4.23), 333 (3.63), 382 (3.46); H (CDC13) 8.0 (1H, d, *J* 8Hz, 8-H), 7.72 (1H, d, *J* 9Hz, 5-H), 7.31 (1H, t, *J* 7Hz, 7-H), 7.16 (1H, t, *J* 7Hz, 6-H), 6.74 and 6.86 (each 1H, d, 10Hz, 1’-H, 1’’-H), 5.4 and 5.5 (each1H, d 10 Hz, 2’-H, 2’’-H), 1.64 and 1.65 (each 3H, s, 8’-Me, 8’’-Me), 5.0 (2H, br t, 6’-H, 6’’-H), 1.56 and 1.57 (each 3H, s, 9’-Me, 9’’-Me), 1.47 and 1.48 (each 3H, s, 10’-Me, 10’’-Me); C (CDC13) 149.5 (C), 147 .6 (C), 131.8 (C), 131.7 (C), 130.2 (C), 127.5(CH), 126.9 (C), 125.3 (CH), 124.3 (CH), 124.3 (CH), 123.6 (CH), 122.5 (CH), 121.0 (CH), 120.5 (C), 118.5 (CH), 117.6 (CH), 107 .9(C) , 106.6 (C) , 79.2 (C), 78.6 (C), 41.2 (CH2), 40.6 (CH2), 26.3 (Me), 25.9 (Me), 25.8 (Me), 25.7 (Me), 22.8 (CH2), 22.7 (CH2), 17.7 (Me), 17.7 (Me).

The second product eluted was the **citran 27**, crystallising from ethanol as colourless crystals (40mg, 4%), (m. 82OC); (Found m/z 295.166; C20H2202 requires MH+ 295.169);  max (cm-1,KBr), 2945,1640, 1450, 1390, 1310, 1150; max (nm, EtOH) , 243 (4.80), 293 (3.65) , 340. (3.23); H (CDC13) 7.97 (1H, d, *J* 8.2, 8-H), 7.64 (1H, d, *J* 8.2 Hz, 5-H), 7.32 (1H, dd, *J* 8.2, 6.8, Hz, 7-H), 7.22 (1H, dd, *J* 8.2, 6.8, Hz, 6-H), 6.86 (1H, s, 4-H), 3.0 (1H, brs, 1’-H), 1.43 and1.65 (each 3H, s, 8’,9’-Me),1.0 (3H, s, 10’-Me); C (CDC13) 154.9 (C), 152.6 (C), 133.9 (C), 126.6 (CH), 125.7 (CH), 122.2 (CH), 122.2 (C), 121.0 (CH), 115.3 (C), 103.0 (CH), 84.9 (C), 75.0 (C), 47.2 (CH), 37.0 (CH2), 35.3 (CH2), 29.8 (Me), 29.2 (Me), 28.9 (CH), 22.1 (CH2), 24.3 (Me);

Further elution afforded the **chromen 25a** as a colourless oil (21mg, 2.2%): (Found m/z 294.163; C20H2202 requires M+ 294.162); max (nm, EtOH) 252 (4.68) , 297 (3.79) , 326 (3.78), 356 (3.78); H (CDC13) 8.00 (1H, d, *J* 8 Hz, 8-H), 7.85 (1H, d, *J* 8 Hz, 5-H), 7.44 (1H, t, 8 Hz, 7-H), 7.27 (1H, t, *J* 8 Hz, 6-H), 7.10 (1H, d, *J* 10Hz, 1’-H), 6.47 (1H, s, 4-H), 5.84 (1H, brs, OH), 5.49 (1H, d, *J*10Hz, 2’-H), 5.08 (1H, brt, 6’-H), 2.0-2.2 (4H, m, 4’-CH2 and 5’-CH2), 1.64 (3H, s, 8’-Me), 1.41(3H, s, 10’-Me), 1.55 (3H, s, 9’-Me); C (CDC13) 153.0 (C), 151.7 (C), 131.61(C), 130.8 (C), 127.1 (CH), 125.3 (CH), 124.2 (CH), 122.7 (CH), 122.5 (CH), 121.0 (CH), 120.4 (C), 118.6 (CH), 107.2 (C), 101.4 (CH), 78.7 (C), 40.8 (CH2), 26.0 (Me), 25.6 (Me), 22.7 (CH2), 17.6 (Me).

**Chromene *O*-acetate 25b**

The chromen **25a**,with pyridine and acetic anhydride at ambient temperature, gave the

*0*-acetate **25b** as a gum (98%): (Found m/z 336.173; C22H2403 requires M+ 336.173): max (nm, EtOH) 219 (4.34), 246 (4.68), 305 (3.74), 318 (3.74), 353 (3.76); H (CDC13) 7.93 (1H, d, *J* 8 Hz, 8-H), 7. 74 (1H, d, *J* 8Hz, 5-H), 7. 47 (1H, brt, *J* 8 Hz, 7-H), 7.33 (1H, brt, *J* 7Hz, 6-H), 6.88 (1H, s, 4-H), 6. 77 (1H, d, *J*10Hz, 1’-H), 5. 62 (1H, d, *J*10Hz, 2’-H), 5.10 (1H, brt, 6’-H), 2.43 (3H, s, COMe), 2.1-2.2 (4H, m, 4’-CH2 and 5’-CH2), 1.43 (3H, s, 10-Me), 1.57 (3H, s, 9’-Me), 1.65 (3H, s, 8’-Me): C (CDC13) 169.0 (C), 150.9 (C), 147.1 (C), 131.6 (C), 130.4 (C), 127.9 (CH), 127.8 (CH), 127.0 (CH x 2), 123.6 (CH), 122.3 (C), 121.4 (CH), 118.2 (CH), 111.9 (C), 111.1 (CH), 78.8 (C), 40.9 (CH2), 27. 0 (CH), 26.1 (Me) , 25.6 (Me), 22.8 (CH2), 20.9 (Me), 17.6 (Me).

**Chromene *O*-methyl ether 25c**

The chromene **25a** with sodium hydroxide and methyl iodide in dimethylsulphoxide afforded the **chromen 25c** as a yellowish oil 99%: (Found m/z 308.177; C21H2402 requires M+ 308.178)

H (CDC13) 8.20 (1H, d, *J* 8 Hz, 8-H), 7.9 (1H, d, *J*8 Hz, 5-H), 7.45 (1H, br t, *J* 7 Hz, 7-H), 7.3 (1H, br t, *J* 7 Hz, 6-H), 7.0 (1H, d, *J* 10Hz, 1’-H), 6.46 (1H, s, 4-H), 5.62 (1H, d, *J* 10Hz, 2’-H), 5.12 (1H, br t, 6’-H), 3.96 (3H, s, OMe), 2.1-2.2 (4H, m, 4’- and 5’-CH2), 1.65 (3H, s, 8’-Me), 1.57 (3 H, s, 9’-Me), 1.43 (3H, s, 10’-Me).

### Acid treatment of the citran 27

(a) The citran (15) (100mg) was dissolved in acetic acid (10ml) and the solutiuon was refluxed for 24 hours. The solvent was removed and the residue was treated with excess pyridine and acetic anhydride. The crude acetate was chromatographed on Florisil, hexane-ether 7:3. The more polar and major product was the **isopropenyl compound 29b** as white crystals, m. 7O0: (Found m/z 336.174; C22H2403 requires M+ 336.173); H (CDC13) 7.65 (1H, *J*, 8 Hz, 5-H), 7.50 (1H, d, *J* 8Hz, 8-H), 7.32 (1H, br t, *J* 8Hz, 7-H), 7.19 (1H, br t, *J*8Hz, 6-H), 7.11 (1H, s, 4-H), 4.68 (1H, br s, 8’-Hb), 4.22 (1H, br s, 8’-Ha), 3.3 (1H, br s, 1’-H), 2.43 (3H, s, COMe), 1.81 (3H, s, 9’-Me), 1.41 (3H, s, 10’-Me); C (CDC13) 169.3 (C), 154.8 (C), 144.5 (C), 146.6 (C), 133.8 (C), 126.2 (CH), 123.3 (CH), 126.5 (CH), 121.2 (CH), 121.2 (C), 117.7 (C), 110.5 (CH2), 107.7 (CH), 74.6 (C), 48.7 (CH), 39.4 (CH2), 36.8 (CH2), 32.9 (CH), 28.8 (Me), 23.0 (CH2), 22.8 (Me), 20.9 (Me)

The less polar and minor product was identified as the **isopropylidene compound 28b** as white crystals m. 131-1320C; H (CDC13) 7. 65 (1H, d, *J* 8Hz, 5-H); 7. 5 (1H, d, *J* 8Hz, 8-H), 7. 33 (1H, t, *J* 7Hz, 8-H), 7.23 (1H, br t, *J* 8Hz, 6-H), 7.12 (1H, s, 4-H), 4.25 (1H, br s, 1’-H), 2.43 (3H, s, COMe), 1.94 (3H, s, 9’-Me), 1.65 (3H, s, 8’-Me), 1.40 (3H, s, 10’-Me); C (CDC13) 154.7 (C), 144.0 (C), 133.8 (C), 126.6 (CH), 126.2 (CH), 126.2 (CH), 123.6 (CH), 122.0 (C), 121.4 (C), 121.0 (C), 121.0 (CH), 120.26 (C), 108.2 (CH), 74.9 (C), 40.4 (CH2), 37.1 (CH2), 31.7 (CH), 28.8 (Me), 23.2 (CH2), 22.8 (Me), 20.5 (Me), 20.5 (Me).

(b) Ina parallel experiment the citran **27** was treated as above and the crude products were methylated using methyl iodide and sodium hydride in DMF. The products were chromatographed on Florisil as above. The more polar and major product was the **methyl ether 29c** as a colourless oil: (Found m/z 308.178; C21H2402 requires M+ 308.178); H (CDC13) 7.96 (1H, d, *J* 8Hz, 8-H), 7.88 (1H, d, *J* 8Hz, 5-H), 7.40 (1H, t, *J* 8Hz, 7-H), 7.26 (1H, t, *J* 8Hz, 6-H), 7.26 (1H, s, 4-H), 4.60 (1H, br s, 8’-CH), 4.10 (1H, br s, 8’-CH), 3.80 (3H, s, OMe), 3. 66 (IH, br s, 1’-H), 1.93 (3H, s, 9’-Me), 1.44 (3H, s, 10’-Me); C (CDC13) 152.5 (C), 152.3 (C), 147.3 (C), 133.3 (C), 125.6 (CH), 123.2 (CH), 122.7 (CH), 122.0 (CH), 121.7 (C), 116.7 (C), 111.2 (CH), 109.5(CH2), 74.2 (C), 61.9 (Me), 49.3 (CH), 39.9 (CH2), 37.4 (CH), 31.6 (CH), 29.1 (Me), 23. 2 (CH2), 23.1 (Me). The less polar and minor product was the **methyl ether 28c** as a colourless oil; H (CDC13) 7.96 (1H, d, *J* 8Hz, 8-H), 7.89 (1H, d, *J* 8Hz, 5-H), 7.40 (1H, t, *J* 8Hz, 7-H), 7.29 (1H, t, *J* 8Hz, 6-H), 7.27 (1H, s, 4-H), 4.58 (1H, br s, 1’-H), 3.86 (3H, s, OMe), 2.0 (3H, s, 9’-Me), 1. 68 (3H, s, 8’-Me), 1.44 (3H, s, 10’-Me); C (CDC13) 152.1 (C), 151.1 (C), 133.1 (C), 125.5 (CH), 123.3 (CH), 122.7 (CH), 122.3 (CH), 122.0 (C), 121.5 (C), 119.9 (C), 119.9 (C), 111.8 (CH), 74.4 (C), 61.8 (Me), 40. 5 (CH2), 37.4 (CH), 31.1 (CH) , 23.2 (CH2 ) , 29.0 (Me), 20.5 (Me), 20.2 (Me).
